# Supplementary material
Source: publisher figshare collection journal article supplement (https://geolsoc.figshare.com/articles/dataset/_/3454925)
Supplement: Supplementary file 1 [file 1]

**Table 2: Calcareous nannoplankton assemblages in the Amiran foreland basin (NE Zagros, Iran)**

| Datum                    | Waypoint | Date   | Index | Latitude | Longitude | Fm./Mbr.   | Sample type | Level in the section (m) | Nannofossil Zone      | Biostratigraphic marker assemblage                                                                                          | Total abundance | Preservation | Comments                                                                             |
|--------------------------|----------|--------|-------|----------|-----------|------------|-------------|--------------------------|-----------------------|-----------------------------------------------------------------------------------------------------------------------------|-----------------|--------------|--------------------------------------------------------------------------------------|
| <b>Cehel Taghi</b>       |          |        |       |          |           |            |             |                          |                       |                                                                                                                             |                 |              |                                                                                      |
| SH                       | 01       | 070508 | -     | 33.42412 | 48.55554  | Am Conglo. | NP          | 812                      | Barren                |                                                                                                                             | B               | --           |                                                                                      |
| SH                       | 20       | 060508 | -     | 33.42350 | 48.55491  | Amiran     | NP          | 725                      |                       |                                                                                                                             |                 |              |                                                                                      |
| SH                       | 19       | 060508 | -     | 33.42276 | 48.55413  | Amiran     | NP          | 670                      | Barren                |                                                                                                                             | B               | --           |                                                                                      |
| SH                       | 18       | 060508 | -     | 33.42306 | 48.55145  | Amiran     | NP          | 543                      | Barren                |                                                                                                                             | B               | --           |                                                                                      |
| SH                       | 17       | 060508 | -     | 33.42225 | 48.54940  | Amiran     | NP          | 465                      | Zone not determinated |                                                                                                                             | P               | P            | Only few specimens of most resistant Cretaceous taxa ie. <i>Watznaueria barnesae</i> |
| SH                       | 16       | 060508 | 1     | 33.42213 | 48.54732  | Amiran     | NP          | 422                      |                       |                                                                                                                             |                 |              |                                                                                      |
| SH                       | 15       | 060508 | -     | 33.42187 | 48.54693  | Amiran     | NP          | 386                      |                       |                                                                                                                             |                 |              |                                                                                      |
| SH                       | 14       | 060508 | 1     | 33.42164 | 48.54619  | Amiran     | NP          | 327                      | Zone not determinated |                                                                                                                             | P               | P            | Only few specimens of most resistant Cretaceous taxa ie. <i>Watznaueria barnesae</i> |
| SH                       | 13       | 060508 | -     | 33.42135 | 48.54551  | Gu/Am      | NP          | 270                      | CC-22                 | <i>Eiffellithus eximius, Uniplanarius trifidum, Uniplanarius gothicum, Uniplanarius sissinghii</i>                          | F               | M            |                                                                                      |
| SH                       | 12       | 060508 | -     | 33.42124 | 48.54462  | Gu/Am      | NP          | 210                      |                       |                                                                                                                             |                 |              |                                                                                      |
| SH                       | 11       | 060508 | -     | 33.42587 | 48.51574  | Gurpi      | NP          | 105                      |                       |                                                                                                                             |                 |              |                                                                                      |
| SH                       | 10       | 060508 | -     | 33.42560 | 48.51549  | Gurpi      | NP          | 75                       | CC-22                 | <i>Eiffellithus eximius, Uniplanarius trifidum, Uniplanarius gothicum, Uniplanarius sissinghii</i>                          | F               | M            |                                                                                      |
| SH                       | 09       | 060508 | -     | 33.42531 | 48.51437  | Gurpi      | NP          | 34                       |                       |                                                                                                                             |                 |              |                                                                                      |
| SH                       | 08       | 060508 | -     | 33.42516 | 48.51421  | Gurpi      | NP          | 17                       |                       |                                                                                                                             |                 |              |                                                                                      |
| SH                       | 07       | 060508 | -     | 33.42494 | 48.51397  | Gurpi      | NP          | 0                        | Zone not determinated |                                                                                                                             | P               | P            |                                                                                      |
| <b>SE Khorramabad</b>    |          |        |       |          |           |            |             |                          |                       |                                                                                                                             |                 |              |                                                                                      |
| SH                       | 06       | 100508 | -     | 33.33377 | 48.62863  | Am Conglo. | NP          | -                        | CC18-CC22             | Abundant <i>Eiffellithus eximius, Lithraphidites cayeuxii</i>                                                               | F               | M            |                                                                                      |
| SH                       | 07       | 100508 | -     | 33.33409 | 48.62840  | Am Conglo. | NP          | -                        | CC21-CC22             | <i>Eiffellithus eximius, Uniplanarius cf. trifidum, Uniplanarius gothicum</i>                                               | F               | M            |                                                                                      |
| <b>Dar Howz</b>          |          |        |       |          |           |            |             |                          |                       |                                                                                                                             |                 |              |                                                                                      |
| SH                       | 05       | 050508 | 1     | 33.60209 | 48.29857  | Shahbazan  | NP          | 1035                     | Zone not determinated |                                                                                                                             | P               | P            | Only few specimens of most resistant Cretaceous taxa ie. <i>Watznaueria barnesae</i> |
| SH                       | 16       | 050508 | 1     | 33.58172 | 48.29299  | Am Conglo. | NP          | 5                        | Barren                |                                                                                                                             | B               | --           |                                                                                      |
| SH                       | 16       | 050508 | 2     | 33.58172 | 48.29299  | Am Conglo. | NP          | 0                        | Barren                |                                                                                                                             | B               | --           |                                                                                      |
| <b>NE Pusht-e Jangal</b> |          |        |       |          |           |            |             |                          |                       |                                                                                                                             |                 |              |                                                                                      |
| SH                       | 05       | 170508 | -     | 33.44884 | 47.98553  | Taleh Zang | NP          | 1259                     | Barren                |                                                                                                                             | B               | --           |                                                                                      |
| SH                       | 21       | 160508 | -     | 33.44534 | 47.98472  | Am-TZ      | NP          | 1005                     | Barren                |                                                                                                                             | B               | --           |                                                                                      |
| SH                       | 20       | 160508 | -     | 33.44522 | 47.98429  | Amiran     | NP          | 971                      | Barren                |                                                                                                                             | B               | --           |                                                                                      |
| SH                       | 19       | 160508 | -     | 33.44510 | 47.98362  | Amiran     | NP          | 940                      |                       |                                                                                                                             |                 |              |                                                                                      |
| SH                       | 18       | 160508 | -     | 33.44478 | 47.98283  | Amiran     | NP          | 873                      | NP2                   | <i>Cruciplacolithus primus</i> large, <i>Futyania petalosa</i> , <i>Coccolithus pelagicus</i> , <i>Neobiscutum parvulum</i> | F               | M            |                                                                                      |
| SH                       | 17       | 160508 | 1     | 33.44464 | 47.98146  | Amiran     | NP          | 787                      |                       |                                                                                                                             |                 |              |                                                                                      |
| SH                       | 15       | 160508 | -     | 33.44193 | 47.98374  | Amiran     | NP          | 732                      | NP1                   | <i>Neobiscutum parvulum</i> , <i>Cruciplacolithus primus</i> small, relatively abundant <i>Thoracosphaera operculata</i>    | F               | M            | Abundant cretaceous reworked species                                                 |
| SH                       | 14       | 160508 | -     | 33.44030 | 47.98480  | Amiran     | NP          | 661                      |                       |                                                                                                                             |                 |              |                                                                                      |
| SH                       | 13       | 160508 | -     | 33.43945 | 47.98451  | Amiran     | NP          | 594                      |                       |                                                                                                                             |                 |              |                                                                                      |
| SH                       | 12       | 160508 | -     | 33.43852 | 47.98365  | Amiran     | NP          | 504                      | CC26b                 | <i>Micula prinsii</i>                                                                                                       | F               | M            |                                                                                      |
| SH                       | 11       | 160508 | -     | 33.43721 | 47.98358  | Amiran     | NP          | 380                      |                       |                                                                                                                             |                 |              |                                                                                      |
| SH                       | 10       | 160508 | -     | 33.43556 | 47.98400  | Amiran     | NP          | 284                      | CC25c                 | <i>Micula murus</i>                                                                                                         | A               | M            |                                                                                      |
| SH                       | 09       | 160508 | -     | 33.43485 | 47.98392  | Amiran     | NP          | 226                      |                       |                                                                                                                             |                 |              |                                                                                      |
| SH                       | 07       | 160508 | -     | 33.43432 | 47.98383  | Amiran     | NP          | 180                      |                       |                                                                                                                             |                 |              |                                                                                      |
| SH                       | 06       | 160508 | -     | 33.43383 | 47.98403  | Amiran     | NP          | 145                      | Zone not determinated |                                                                                                                             | P               | P            |                                                                                      |





|                    |      |        |   |          |          |                 |    |      |                       |                                                                                                                                                                          |   |     |                                                                                                                                                                                                          |
|--------------------|------|--------|---|----------|----------|-----------------|----|------|-----------------------|--------------------------------------------------------------------------------------------------------------------------------------------------------------------------|---|-----|----------------------------------------------------------------------------------------------------------------------------------------------------------------------------------------------------------|
| SH                 | 02   | 200508 | - | 33.12111 | 48.04206 | Purple Shales   | NP | 100  | NP4 (upper part)      | <i>Ellipsolithus macellus</i> , <i>Sphenolithus primus</i> ,<br><i>Chiasmolithus edentulus</i>                                                                           | F | M   |                                                                                                                                                                                                          |
| SH                 | 01   | 200508 | - | 33.11842 | 48.03672 | Gurpi           | NP | 0    | Cretaceous            | <i>Prediscosphaera</i> spp., <i>Micula</i> spp.,                                                                                                                         | R | M/P |                                                                                                                                                                                                          |
| <b>NE Rit</b>      |      |        |   |          |          |                 |    |      |                       |                                                                                                                                                                          |   |     |                                                                                                                                                                                                          |
| SH                 | 4    | 180607 | 2 | 33.07638 | 48.24117 | Shahbazan       | NP | 1182 | Barren                |                                                                                                                                                                          | B | --  |                                                                                                                                                                                                          |
| SH                 | 5    | 180607 | 2 | 33.07621 | 48.24116 | Shahbazan       | NP | 1170 | Barren                |                                                                                                                                                                          | B | --  |                                                                                                                                                                                                          |
| SH                 | 6    | 180607 | 2 | 33.07609 | 48.24117 | Shahbazan       | NP | 1131 | Barren                |                                                                                                                                                                          | B | --  |                                                                                                                                                                                                          |
| SH                 | 11   | 180607 | 3 | 33.07266 | 48.24037 | Taleh Zang      | NP | 845  | Zone not determinated |                                                                                                                                                                          | F | M   | Mostly cretaceous reworked specimens with few paleocene species                                                                                                                                          |
| SH                 | 12   | 180607 | 3 | 33.0706  | 48.24013 | Taleh Zang      | NP | 701  | Zone not determinated |                                                                                                                                                                          | R | M/P | Mostly cretaceous reworked specimens with few paleocene species                                                                                                                                          |
| SH                 | 15   | 180607 | 1 | 33.06858 | 48.23838 | Amiran          | NP | 578  | NP9                   | <i>Discoaster multiradiatus</i> , <i>Fasciculithus</i> spp.,<br><i>Scapholithus apertus</i>                                                                              | C | M   | Only 3 specimens of <i>Discoaster</i> have been recorded. Few cretaceous reworked specimens                                                                                                              |
| SH                 | 16   | 180607 | 1 | 33.06815 | 48.23875 | Amiran          | NP | 531  | NP9                   | <i>Discoaster multiradiatus</i> , <i>Fasciculithus</i> spp.,<br><i>Scapholithus apertus</i>                                                                              | F | M   | Few specimens of <i>Discoaster</i> have been recorded. Few cretaceous reworked specimens                                                                                                                 |
| SH                 | 17   | 180607 | 1 | 33.06516 | 48.23604 | Amiran          | NP | 351  | Barren                |                                                                                                                                                                          |   |     |                                                                                                                                                                                                          |
| SH                 | 18   | 180607 | 1 | 33.06155 | 48.23334 | Amiran          | NP | 91   | NP7                   | <i>Discoaster</i> cf. <i>mohleri</i> , <i>Scapholithus apertus</i>                                                                                                       | C | M   | The presence of representatives of the genus <i>Discoaster</i> indicate that this sample corresponds to Zone NP7. The species total abundance decreased from this sample upward.                         |
| SH                 | 19   | 180607 | 1 | 33.06003 | 48.21956 | Purple Shale Mb | NP | 12   | NP5                   | <i>Fasciculithus tympaniformis</i> , <i>Fasciculithus billii</i> ,<br><i>Heliolithus cantabriae</i> , <i>Toweius tovae</i>                                               | A | M   | Few cretaceous reworked specimens                                                                                                                                                                        |
| SH                 | 20   | 180607 | 1 | 33.05965 | 48.21949 | Gurpi           | NP | 9    | NP4 (upper part)      | <i>Ellipsolithus macellus</i> , <i>Sphenolithus primus</i> ,<br><i>Fasciculithus vertebratooides</i> , <i>Chiasmolithus edentulus</i> , <i>Neochiastozygus perfectus</i> | A | M   | Few cretaceous reworked specimens                                                                                                                                                                        |
| <b>SW Rit</b>      |      |        |   |          |          |                 |    |      |                       |                                                                                                                                                                          |   |     |                                                                                                                                                                                                          |
| SH                 | 3    | 230607 | 1 | 32.99766 | 48.20467 | Purple Shales   | NP | 2    | NP6                   | <i>Heliolithus kleinPELLI</i> , absence of <i>Discoaster mohleri</i>                                                                                                     | A | G/M |                                                                                                                                                                                                          |
| SH                 | 1    | 230607 | 1 | 32.99595 | 48.21333 | Amiran          | NP | 5    | NP9 (lower part)      | <i>Discoaster multiradiatus</i> , <i>Fasciculithus</i> spp.,<br><i>Discoaster nobilis</i>                                                                                | A | G/M | First forms of <i>D. multiradiatus</i>                                                                                                                                                                   |
| SH                 | 2    | 230607 | 1 | 32.99625 | 48.21313 | Amiran          | NP | 15   | NP9                   | <i>Fasciculithus</i> spp., <i>Scapholithus apertus</i> ,<br><i>Zygrhablithus bijugatus</i>                                                                               | R | M   | No <i>Discoaster</i> spp. have been found, however the presence of <i>Scapholithus apertus</i> and several species of <i>Fasciculithus</i> indicate that this part of the section correspond to Zone NP9 |
| SH                 | 014  | 120607 | 2 | 33.01004 | 48.19553 | Amiran          | NP | 64   |                       |                                                                                                                                                                          |   |     |                                                                                                                                                                                                          |
| SH                 | 014  | 120607 | 4 | 33.01004 | 48.19553 | Amiran          | NP | 129  |                       |                                                                                                                                                                          |   |     |                                                                                                                                                                                                          |
| SH                 | 3    | 220607 | 1 | 33.00368 | 48.19929 | Amiran          | NP | 130  | NP9                   | <i>Discoaster multiradiatus</i> , <i>Fasciculithus</i> spp.,<br><i>Scapholithus apertus</i>                                                                              | R | M   |                                                                                                                                                                                                          |
| SH                 | 4    | 220607 | 1 | 33.00899 | 48.19583 | Amiran          | NP | 135  | NP10-11               | absence of <i>Fasciculithus</i>                                                                                                                                          | R | M   |                                                                                                                                                                                                          |
| SH                 | 6    | 220607 | 1 | 33.00713 | 48.19418 | Amiran          | NP | 189  | NP10-11               | absence of <i>Fasciculithus</i>                                                                                                                                          | P | M   |                                                                                                                                                                                                          |
| SH                 | 8    | 220607 | 1 | 33.00571 | 48.19225 | Amiran          | NP | 216  | NP10-11               | absence of <i>Fasciculithus</i> , <i>Discoaster</i> cf.<br><i>diastypus</i>                                                                                              | P | M   |                                                                                                                                                                                                          |
| SH                 | 9    | 220607 | 1 | 33.00592 | 48.18915 | Amiran          | NP | 408  | NP10-11               | absence of <i>Fasciculithus</i>                                                                                                                                          | P | M   |                                                                                                                                                                                                          |
| <b>Kush Ab</b>     |      |        |   |          |          |                 |    |      |                       |                                                                                                                                                                          |   |     |                                                                                                                                                                                                          |
| SH                 | 5    | 230607 | 1 | 32.94552 | 48.12228 | Taleh Zang      | NP | 10   | NP11                  | <i>Sphenolithus editus</i> , absence of <i>Discoaster lodoensis</i>                                                                                                      | F | M   | more than 70% cretaceous reworked specimens                                                                                                                                                              |
| SH                 | 6    | 230607 | 1 | 32.94465 | 48.12244 | Taleh Zang      | NP | 29   | NP12                  | <i>Sphenolithus editus</i> , <i>Discoaster lodoensis</i> ,<br><i>Tribrachiatulus orthostylus</i>                                                                         | F | M   | more than 70% cretaceous reworked specimens                                                                                                                                                              |
| <b>NE Chenareh</b> |      |        |   |          |          |                 |    |      |                       |                                                                                                                                                                          |   |     |                                                                                                                                                                                                          |
| GC                 | 3935 | 150508 | 1 | 32.92214 | 48.07167 | Gurpi           | NP |      | NP2                   | <i>Cruciplacolithus primus</i> large, <i>Coccolithus pelagicus</i> , abundant <i>Futyania petalosa</i>                                                                   | C | M   |                                                                                                                                                                                                          |

|    |      |        |   |          |          |                      |    |       |                      |                                                                                                                                                              |   |     |                                                                                                                                                             |  |
|----|------|--------|---|----------|----------|----------------------|----|-------|----------------------|--------------------------------------------------------------------------------------------------------------------------------------------------------------|---|-----|-------------------------------------------------------------------------------------------------------------------------------------------------------------|--|
| GC | 3936 | 150508 | 2 | 32.92239 | 48.07103 | Gurpi                | NP |       | NP3                  | <i>Cruciplacolithus edwardsii</i> , <i>Cruciplacolithus tenuis</i> , abundant <i>Prinsius dimorphosus</i>                                                    | F | M   |                                                                                                                                                             |  |
| GC | 3937 | 150508 | 3 | 32.92272 | 48.07069 | Gurpi                | NP |       | basal NP4            | <i>Toweius pertusus</i> , <i>Neochiastozygus eosaepe</i> , <i>Prinsius bisulcus</i>                                                                          | C | M   | The Zone NP4 marker, <i>Ellipsolithus macellus</i> , is not present; however, the occurrence of <i>T. pertusus</i> and <i>N. eosaepe</i> indicate Zone NP4. |  |
| GC | 3938 | 150508 | 4 | 32.92325 | 48.07022 | Gurpi                | NP |       | NP4                  | <i>Ellipsolithus macellus</i> , <i>Sphenolithus primus</i>                                                                                                   | C | M   |                                                                                                                                                             |  |
| SH | 2    | 190607 | 1 | 32.92306 | 48.07032 | Purple shales        | NP | 0     | NP5                  | <i>Fasciculithus tympaniformis</i> , <i>Fasciculithus pileatus</i> , <i>Fasciculithus janni</i> , <i>Chismolithus consuetus</i> , <i>Toweius cf. eminens</i> | C | G/M | Presence of few cretaceous reworked specimens. Presence of several <i>Fasciculithus</i> species of the lower part of Zone NP5                               |  |
| SH | 4    | 190607 | 1 | 32.92333 | 48.07072 | Gurpi-Amiran         | NP | 20    | NP8 (uppermost part) | <i>Discoaster mohleri</i> , <i>Discoaster nobilis</i> , <i>Discoaster cf. multiradiatus</i> , <i>Fasciculithus</i> spp.                                      | F | G/M | Transitional forms between <i>D. mohleri</i> and <i>D. multiradiatus</i> .                                                                                  |  |
| SH | 6    | 190607 | 3 | 32.92377 | 48.071   | Amiran               | NP | 56    | Zone not determined  |                                                                                                                                                              | P | P   | Mostly cretaceous reworked specimens                                                                                                                        |  |
| SH | 7    | 190607 | 1 | 32.92417 | 48.07155 | Amiran               | NP | 84    | NP12 (lower part)    | <i>Discoaster cf. lodoensis</i> , <i>Sphenolithus editus</i> , <i>Sphenolithus radians</i> , <i>Discoaster kuepperi</i>                                      | R | M   | 80% of the autochthonous specimens are <i>Sphenolithus</i>                                                                                                  |  |
| SH | 10   | 190607 | 1 | 32.9249  | 48.07246 | Amiran               | NP | 157   | Zone not determined  |                                                                                                                                                              | P | P   | Almost barren                                                                                                                                               |  |
| SH | 11   | 190607 | 2 | 32.92491 | 48.0726  | Amiran               | NP | 163   |                      |                                                                                                                                                              |   |     |                                                                                                                                                             |  |
| SH | 14   | 190607 | 3 | 32.92383 | 48.07624 | Amiran               | NP | 181,2 | NP12                 | <i>Discoaster lodoensis</i> , <i>Tribrachiatius orthostylus</i>                                                                                              | F | M   | 40% cretaceous reworked specimens                                                                                                                           |  |
| SH | 17   | 190607 | 1 | 32.92429 | 48.07945 | Amiran               | NP | 280   | NP12                 | <i>Discoaster lodoensis</i> , <i>Tribrachiatius orthostylus</i>                                                                                              | F | M   | More than 60% cretaceous reworked specimens                                                                                                                 |  |
| SH | 18   | 190607 | 1 | 32.92439 | 48.07977 | Amiran               | NP | 296   | NP12                 | <i>Discoaster lodoensis</i> , <i>Sphenolithus radians</i> , <i>Sphenolithus seditus</i>                                                                      | C | M   | More than 70% cretaceous reworked specimens                                                                                                                 |  |
| SH | 2    | 200607 | 2 | 32.92443 | 48.08002 | Amiran               | NP | 311   | Zone not determined  |                                                                                                                                                              | P | P   | Almost barren                                                                                                                                               |  |
| SH | 3    | 200607 | 1 | 32.9245  | 48.08086 | Amiran               | NP | 455   | NP12                 | <i>Discoaster lodoensis</i> , <i>Tribrachiatius orthostylus</i>                                                                                              | A | M   | More than 60% cretaceous reworked specimens                                                                                                                 |  |
| SH | 4    | 200607 | 3 | 32.92615 | 48.08264 | Amiran               | NP | 500   | Zone not determined  |                                                                                                                                                              | P | P   | Almost barren                                                                                                                                               |  |
| SH | 5    | 200607 | 3 | 32.92616 | 48.08311 | Taleh Zang           | NP | 510   | Zone not determined  |                                                                                                                                                              | P | P   | Almost barren                                                                                                                                               |  |
| SH | 6    | 200607 | 3 | 32.92629 | 48.08312 | Taleh Zang           | NP | 520   | Zone not determined  |                                                                                                                                                              | R | M   | Only cretaceous reworked specimens                                                                                                                          |  |
| SH | 11   | 200607 | 1 | 32.92667 | 48.08443 | Taleh Zang - Kashkan | NP | 574   | Barren               |                                                                                                                                                              | B | --  |                                                                                                                                                             |  |
| SH | 12   | 200607 | 1 | 32.9264  | 48.08461 | Taleh Zang - Kashkan | NP | 581,5 | Barren               |                                                                                                                                                              | B | --  |                                                                                                                                                             |  |
| SH | 17   | 200607 | 2 | 32.92681 | 48.08507 | Taleh Zang - Kashkan | NP | 649   | Barren               |                                                                                                                                                              | B | --  |                                                                                                                                                             |  |
| SH | 18   | 200607 | 1 | 32.92691 | 48.08506 | Taleh Zang - Kashkan | NP | 653,5 | Barren               |                                                                                                                                                              | B | --  |                                                                                                                                                             |  |
| SH | 19   | 200607 | 1 | 32.92725 | 48.08403 | Taleh Zang - Kashkan | NP | 671   | Barren               |                                                                                                                                                              | B | --  |                                                                                                                                                             |  |
| SH | 20   | 200607 | 2 | 32.92752 | 48.08415 | Taleh Zang - Kashkan | NP | 685,5 | Barren               |                                                                                                                                                              | B | --  |                                                                                                                                                             |  |
| SH | 21   | 200607 | 2 | 32.92726 | 48.0839  | Shahbazan-Asmari     | NP | 798   | Barren               |                                                                                                                                                              | B | --  |                                                                                                                                                             |  |

**A** (abundant): >30 specimens per field of view (spp./f.v.); **C** (common): 10 to 30 spp./f.v.; **F** (few): 1 to 10 spp./f.v.; **R** (rare): 0,1 to 1 spp./f.v.; **P** (presence): <0,1 spp./f.v.; **B** (barren): no nannofossils.

**G** (good): little or no evidence of dissolution and/or secondary overgrowth; fully preserved diagnostic characters. **M** (moderate): dissolution and/or secondary overgrowth; partially altered primary morphological characters; nearly all the specimens can be identified at the species level. **P** (poor): severe dissolution, fragmentation and/or secondary overgrowth; largely destroyed primary features; many specimens cannot be identified at the species level.

n=170
