# Supplementary material
Source: publisher figshare collection journal article supplement (https://geolsoc.figshare.com/articles/dataset/_/3454925)
Supplement: Supplementary file 2 [file 1]

**Table 4: Strontium isotopic concentrations in the Amiran foreland basin (NE Zagros, Iran)**

| Sample          | Lat. (Decimal) | Long. (Decimal) | Section           | Formation  | Level | $^{87}\text{Sr}/^{86}\text{Sr}$ | Error(* $10^{-6}$ ) |
|-----------------|----------------|-----------------|-------------------|------------|-------|---------------------------------|---------------------|
| SH-10-050508    | 33.59589       | 48.29660        | Dar Howz          | Tarbur     | 1301  | 0.707525                        | 9                   |
| SH-04-140508-2  | 33.60201       | 48.29856        | Dar Howz          | Shahbazan  | 1303  | 0.707810                        | 7                   |
| SH-01-050508    | 33.60339       | 48.29915        | Dar Howz          | Shahbazan  | 1305  | 0.708487                        | 8                   |
| SH-03-140508    | 33.60194       | 48.29852        | Dar Howz          | Shahbazan  | 1305  | 0.707819                        | 6                   |
| SH-10-140508    | 33.60259       | 48.29884        | Dar Howz          | Shahbazan  | 1307  | 0.708424                        | 6                   |
| SH-070508-14    | 33.60226       | 48.29867        | Dar Howz          | Shahbazan  | 1307  | 0.708199                        | 6                   |
| SH-06-140508-2  | 33.60218       | 48.29863        | Dar Howz          | Shahbazan  | 1308  | 0.708358                        | 7                   |
| SH-01-140508-2  | 33.60181       | 48.29849        | Dar Howz          | Shahbazan  | 1311  | 0.707766                        | 6                   |
| SH-04-050508-02 | 33.60249       | 48.29877        | Dar Howz          | Shahbazan  | 1317  | 0.708071                        | 6                   |
| SH-04-050508-01 | 33.60249       | 48.29877        | Dar Howz          | Asmari     | 1317  | 0.708438                        | 6                   |
| SH-16-070508    | 33.43032       | 48.57305        | Cehel Taghi       | Asmari     | 2070  | 0.708413                        | 6                   |
| SH-18-070508    | 33.43078       | 48.57313        | Cehel Taghi       | Asmari     | 2102  | 0.708482                        | 11                  |
| SH-07-170508    | 33.45002       | 47.98610        | NE Pusht-e Jangal | Shahbazan  | 1359  | 0.707552                        | 6                   |
| SH-09-170508    | 33.45044       | 47.99086        | NE Pusht-e Jangal | Shahbazan  | 1490  | 0.707974                        | 6                   |
| SH-12-170508    | 33.45281       | 47.99200        | NE Pusht-e Jangal | Asmari     | 1498  | 0.708366                        | 6                   |
| SH-11-170508    | 33.45254       | 47.99171        | NE Pusht-e Jangal | Asmari     | 1500  | 0.708413                        | 5                   |
| SH-10-170508    | 33.45161       | 47.99096        | NE Pusht-e Jangal | Shahbazan  | 1521  | 0.707954                        | 5                   |
| SH-11-180508    | 33.42602       | 47.93044        | SW Pusht-e Jangal | Amiran     | 389   | 0.707627                        | 6                   |
| SH-08-190508    | 33.41470       | 47.92020        | SW Pusht-e Jangal | Shahbazan  | 1078  | 0.707736                        | 6                   |
| SH-09-190508    | 33.41421       | 47.92017        | SW Pusht-e Jangal | Shahbazan  | 1078  | 0.708024                        | 6                   |
| SH-20-200508    | 33.14115       | 48.04448        | NE Sultan         | TalehZang  | 1535  | 0.707692                        | 3                   |
| SH-27-200508    | 33.14749       | 48.05013        | NE Sultan         | Shahbazan  | 1688  | 0.707798                        | 7                   |
| SH-28-200508    | 33.14835       | 48.04863        | NE Sultan         | Shahbazan  | 1711  | 0.707741                        | 6                   |
| SH-29-200508    | 33.14933       | 48.04983        | NE Sultan         | Shahbazan  | 1753  | 0.707776                        | 7                   |
| SH-6-130607-2   | 33.16988       | 47.93748        | SW Sultan         | Gurpi      | 32    | 0.707728                        | 4                   |
| SH-9-130607-3   | 33.16945       | 47.93690        | SW Sultan         | Gurpi      | 56    | 0.707720                        | 5                   |
| SH-15-130607-2  | 33.16888       | 47.93515        | SW Sultan         | Gurpi      | 93    | 0.707727                        | 6                   |
| SH-15-160607-2  | 33.16876       | 47.91130        | SW Sultan         | Taleh Zang | 891   | 0.707710                        | 6                   |

|                |          |          |             |            |      |          |   |
|----------------|----------|----------|-------------|------------|------|----------|---|
| SH-17-160607-2 | 33.16866 | 47.91130 | SW Sultan   | Taleh Zang | 905  | 0.707703 | 6 |
| SH-3-170607-2  | 33.16866 | 47.91124 | SW Sultan   | Taleh Zang | 941  | 0.707741 | 5 |
| SH-7-170607-2  | 33.16854 | 47.91062 | SW Sultan   | Taleh Zang | 981  | 0.707727 | 6 |
| SH-12-170607-2 | 33.16837 | 47.91009 | SW Sultan   | Taleh Zang | 1027 | 0.707697 | 6 |
| SH-14-170607-1 | 33.16696 | 47.91023 | SW Sultan   | Taleh Zang | 1045 | 0.707763 | 6 |
| SH-16-170607-2 | 33.16602 | 47.91059 | SW Sultan   | Taleh Zang | 1075 | 0.707710 | 6 |
| SH-17-170607-2 | 33.16525 | 47.91063 | SW Sultan   | Taleh Zang | 1097 | 0.707676 | 5 |
| SH-13-210607-1 | 33.16707 | 47.90654 | SW Sultan   | Kashkan    | 1257 | 0.707782 | 6 |
| SH-30-170607-2 | 33.16692 | 47.90628 | SW Sultan   | Shahbazan  | 1307 | 0.707772 | 5 |
| SH-32-170607-2 | 33.16652 | 47.90575 | SW Sultan   | Shahbazan  | 1335 | 0.707762 | 4 |
| SH20-210607-2  | 33.16624 | 47.90526 | SW Sultan   | Shahbazan  | 1378 | 0.707795 | 6 |
| SH25-210607-2  | 33.16585 | 47.90434 | SW Sultan   | Shahbazan  | 1466 | 0.708102 | 5 |
| SH-13-180607-2 | 33.06980 | 48.23990 | NE Rit      | Taleh Zang | 648  | 0.707691 | 5 |
| SH-12-180607-2 | 33.07060 | 48.24013 | NE Rit      | Taleh Zang | 701  | 0.707667 | 5 |
| SH-11-180607-2 | 33.07266 | 48.24037 | NE Rit      | Taleh Zang | 845  | 0.707693 | 5 |
| SH-6-180607-1  | 33.07609 | 48.24117 | NE Rit      | Shahbazan  | 1131 | 0.707867 | 5 |
| SH-5-180607-1  | 33.07621 | 48.24116 | NE Rit      | Shahbazan  | 1171 | 0.707824 | 5 |
| SH-10-220607-2 | 33.00860 | 48.18523 | SW Rit      | Amiran     | 420  | 0.707704 | 4 |
| WP-12-220607-2 | 33.00829 | 48.18527 | SW Rit      | Taleh Zang | 558  | 0.707713 | 5 |
| SH-14-220607-2 | 33.00809 | 48.18598 | SW Rit      | Taleh Zang | 598  | 0.707715 | 6 |
| SH-15-220607-2 | 33.00610 | 48.18890 | SW Rit      | Taleh Zang | 619  | 0.707678 | 5 |
| SH-5-230607-2  | 32.94552 | 48.12228 | Kush Ab     | Taleh Zang | 10   | 0.707693 | 5 |
| SH-6-230607-3  | 32.94465 | 48.12244 | Kush Ab     | Taleh Zang | 29   | 0.707592 | 5 |
| SH-7-230607-2  | 32.94379 | 48.12239 | Kush Ab     | Taleh Zang | 51   | 0.707677 | 5 |
| SH-13-230607-2 | 32.92415 | 48.10731 | Kush Ab     | Taleh Zang | 320  | 0.707801 | 4 |
| SH-14-230607-2 | 32.92401 | 48.10643 | Kush Ab     | Taleh Zang | 334  | 0.707714 | 5 |
| SH-10-190607-2 | 32.92490 | 48.07246 | NE Chenareh | Amiran     | 157  | 0.707743 | 5 |
| SH-14-190607-1 | 32.92443 | 48.08002 | NE Chenareh | Amiran     | 182  | 0.707730 | 5 |
| SH-2-200607-1  | 32.92615 | 48.08264 | NE Chenareh | Amiran     | 311  | 0.707584 | 5 |
| SH-4-200607-1  | 32.92681 | 48.08507 | NE Chenareh | Amiran     | 500  | 0.707709 | 5 |
| SH-17-200607-1 | 32.92725 | 48.08403 | NE Chenareh | TZ-Ks      | 649  | 0.707801 | 5 |
| SH-19-200607-2 | 32.92726 | 48.08390 | NE Chenareh | TZ-Ks      | 671  | 0.707862 | 5 |
| SH-20-200607-1 | 32.92383 | 48.07624 | NE Chenareh | TZ-Ks      | 686  | 0.707885 | 6 |
| SH-21-200607-1 | 32.92752 | 48.08415 | NE Chenareh | Shahbazan  | 799  | 0.707848 | 5 |

n= 62 samples
