# Supplementary material
Source: publisher figshare collection journal article supplement (https://geolsoc.figshare.com/articles/dataset/_/3454925)
Supplement: Supplementary file 3 [file 1]

**Table 3: Palynologic assemblages in the Amiran foreland basin (NE Zagros, Iran)**

Total number of samples analysed: 54

**Section: Amiran**

**Summarised stratigraphy (interpreted)**

|      |   |      |                         |
|------|---|------|-------------------------|
| SH-2 | - | SH-2 | Early Eocene (Ypresian) |
| SH-1 | - | SH-1 | Indeterminate           |

| Sample        | Level in section (m) | Analysis | Age                        | Biozone | Formation | Palaeoenvironment       | Biostratigraphy comments                                                                                               |
|---------------|----------------------|----------|----------------------------|---------|-----------|-------------------------|------------------------------------------------------------------------------------------------------------------------|
| SH-2-110607-1 | 1196                 | P        | earliest Eocene (Ypresian) | TP 13b  | Kashkan   | Inner to middle neritic | <b>P:</b> <i>Apectodinium augustum</i> , <i>Thalassiphora pelagica</i><br><b>PF:</b> Poor to very poor OM, type M2(3)s |
| SH-1-110607-1 | 1105                 | P        | Indeterminate              | Indet   | Kashkan   | Terrestrial             | <b>P:</b> No age diagnostic forms, long-ranging sporomorphs only.<br><b>PF:</b> Moderate OM, type T2(3)                |

Total number of samples analysed: 2

**Section: SW Sultan**

**Summarised stratigraphy (interpreted)**

|       |   |       |                                                     |
|-------|---|-------|-----------------------------------------------------|
| SH-23 | - | SH-16 | Indeterminate                                       |
| SH-15 | - | SH-15 | Middle Eocene (Lutetian) to Early Eocene (Ypresian) |
| SH-13 | - | SH-22 | Indeterminate                                       |
| SH-20 | - | SH-17 | Early Eocene (Ypresian)                             |

| Sample         | Level in section (m) | Analysis | Age           | Biozone    | Formation          | Palaeoenvironment | Biostratigraphy comments                                                                          |
|----------------|----------------------|----------|---------------|------------|--------------------|-------------------|---------------------------------------------------------------------------------------------------|
| SH-23-210607-1 | 1429                 | P        | Indeterminate | Unassigned | Shahbazan - Asmari | Continental?      | <b>P:</b> No age diagnostic forms.<br><b>PF:</b> Poor OM, type T5(3)b. May be modern contaminant. |

|                |        |   |                                                     |               |            |                         |                                                                                                                                                           |
|----------------|--------|---|-----------------------------------------------------|---------------|------------|-------------------------|-----------------------------------------------------------------------------------------------------------------------------------------------------------|
| SH-16-210607-1 | 1298   | P | Indeterminate                                       | Unassigned    | Kashkan    | Continental?            | P: No age diagnostic forms<br>PF: Moderate to good OM, type T?2                                                                                           |
| SH-15-210607-2 | 1278   | P | Middle Eocene (Lutetian) to Early Eocene (Ypresian) | TP 12c - 13a  | Kashkan    | Inner neritic           | P: <i>Apectodinium homomorphum</i> , <i>Cordosphaeridium inodes</i><br>PF: Very poor OM, type M2                                                          |
| SH-13-210607-2 | 1258   | P | Indeterminate                                       | Unassigned    | Kashkan    | Continental?            | P: No age diagnostic forms<br>PF: Poor to moderate OM, type T2                                                                                            |
| SH-28-170607-1 | 1249.5 | P | Indeterminate                                       | Unassigned    | Kashkan    | Continental?            | P: No age diagnostic forms<br>PF: Poor OM, Type T2s, + modern contamination                                                                               |
| SH-24-170607-1 | 1156   | P | Indeterminate                                       | Indeterminate | Kashkan    | Indeterminate           | P: Barren.<br>PF: Poor OM, mostly small P4.                                                                                                               |
| SH-22-170607-1 | 1132   | P | Indeterminate                                       | Unassigned    | Kashkan    | Transitional (brackish) | P: No age diagnostic forms<br>PF: Poor OM, type BM2(3), may be mostly modern contaminant                                                                  |
| SH-20-170607-2 | 1103.5 | P | Early Eocene, (Ypresian)                            | TP 13a        | Kashkan    | Inner neritic           | P: <i>Apectodinium paniculatum</i> , <i>A. homomorphum</i> , <i>A. quinquelatum</i> ,<br><i>Diphyes colligerum</i> .<br>PF: Moderate to good OM, type M2s |
| SH-17-170607-4 | 1097.5 | P | Indeterminate                                       | Unassigned    | Taleh Zang | Continental?            | P: No age diagnostic forms.<br>PF: Poor OM, type T?1/2.                                                                                                   |
| SH-05-170607-2 | 953    | P | Early Eocene, (Ypresian)                            | TP 13a        | Taleh Zang | Inner neritic           | P: <i>Apectodinium paniculatum</i> , <i>Thalassiphora patula</i> .<br>PF: Good OM, type M2.                                                               |
| SH-12-160607-2 | 875.5  | P | Late Eocene (Priabonian) to Early Eocene (Ypresian) | TP 12 - 13    | Amiran     | Inner neritic           | P: <i>Cordosphaeridium inodes</i> .<br>PF: Good OM, type M2.                                                                                              |
| SH-09-160607-3 | 815    | P | Late Eocene (Priabonian) to Early Eocene (Ypresian) | TP 12 - 13    | Amiran     | Inner neritic           | P: <i>Cordosphaeridium inodes</i> , <i>Charlesdowniea tenuivirgula</i> .<br>PF: Good OM, type M2                                                          |
| SH-07-170607-3 | 770    | P | Early Oligocene to Early Eocene (Ypresian)          | TP 9 - 13     | Amiran     | Transitional (brackish) | P: <i>Cordosphaeridium gracile</i> .<br>PF: Poor - very poor OM, type MB3(5). May be mostly modern contaminant.                                           |
| SH-05-160607-3 | 744.5  | P | Indeterminate                                       | Unassigned    | Amiran     | Continental?            | P: No age diagnostic forms.<br>PF: Good OM, type T?2.                                                                                                     |
| SH-1-160607-2  | 553    | P | Indeterminate                                       | Unassigned    | Amiran     | Inner neritic           | P: No age diagnostic forms.<br>PF: Poor to moderate OM, type M2s.                                                                                         |
| SH-12-150607-2 | 414    | P | Indeterminate                                       | Unassigned    | Amiran     | Continental?            | P: No age diagnostic forms.<br>PF: Poor to moderate OM, type T?2.                                                                                         |
| SH-9-160607-2  | 393    | P | Indeterminate                                       | Unassigned    | Amiran     | Indeterminate           | P: No age diagnostic forms.<br>PF: Good OM, mostly P4, type (TB?)2.                                                                                       |
| SH-06-150607-2 | 370    | P | Late Eocene (Priabonian) to Early Eocene (Ypresian) | TP 12 - 13    | Amiran     | Inner to middle neritic | P: <i>Cordosphaeridium inodes</i> , <i>Phthanoperidinium</i> spp.<br>PF: Good OM, type M2(3).                                                             |

|                |     |   |                                                     |            |        |                                                 |                                                                                                                                                                                                                                                                               |
|----------------|-----|---|-----------------------------------------------------|------------|--------|-------------------------------------------------|-------------------------------------------------------------------------------------------------------------------------------------------------------------------------------------------------------------------------------------------------------------------------------|
| SH-03-150607-1 | 340 | P | Late Eocene (Priabonian) to Early Eocene (Ypresian) | TP 12-13   | Amiran | Inner neritic                                   | <b>P:</b> <i>Areoligera</i> sp., stratigraphical position.<br><b>PF:</b> Moderate to good OM, type M2                                                                                                                                                                         |
| SH-23-140607-2 | 330 | P | Early Eocene (Ypresian)                             | TP13b      | Amiran | Inner to middle neritic                         | <b>P:</b> <i>Apectodinium quinquelatum</i> , <i>A. paniculatum</i> , <i>A. homomorphum</i> .<br><b>PF:</b> Good OM, type M2(3).                                                                                                                                               |
| SH-20-140607-1 | 299 | P | Early Miocene to Eocene                             | TP 6b - 13 | Amiran | Transitional (brackish)                         | <b>P:</b> <i>Homotryblum tenuispinosum</i> .<br><b>PF:</b> Moderate OM, type MB3b. May be mostly modern contaminant.                                                                                                                                                          |
| SH-16-140607-2 | 270 | P | Early Eocene (Ypresian)                             | TP13b      | Amiran | Inner to middle neritic                         | <b>P:</b> <i>Apectodinium paniculatum</i> , <i>A. homomorphum</i> , <i>A. quinquelatum</i> , <i>Adnatosphaeridium robustum</i> , <i>Homotryblum tenuispinosum</i> , <i>Diphyes colligerum</i> .<br><b>PF:</b> Good OM, type M3(2)                                             |
| SH-14-140607-2 | 255 | P | Early Eocene (Ypresian)                             | TP13b      | Amiran | Inner neritic                                   | <b>P:</b> <i>Apectodinium quinquelatum</i> .<br><b>PF:</b> Good OM, type M2.                                                                                                                                                                                                  |
| SH-11-140607-2 | 229 | P | Early Eocene (Ypresian)                             | TP13b      | Amiran | Inner to middle neritic                         | <b>P:</b> <i>Apectodinium homomorphum</i> , <i>Adnatosphaeridium robustum</i> , <i>Perfotricolpites digitatus</i> , stratigraphical position.<br><b>PF:</b> Good OM, type M2(3).                                                                                              |
| SH-08-140607-2 | 200 | P | Early Eocene (Ypresian)                             | TP13b      | Amiran | Inner to middle neritic<br><br>some restriction | <b>P:</b> <i>Spiniferites septatus</i> , <i>Phthanoperidinium amoenum</i> , <i>P. comatum</i> , <i>Adnatosphaeridium robustum</i> , <i>Areoligera coronata</i> ; stratigraphical position.<br><b>PF:</b> Good OM, type M3(5)b.                                                |
| SH-05-140607-3 | 177 | P | Indeterminate                                       | Unassigned | Amiran | Transitional (brackish)                         | <b>P:</b> No age diagnostic forms.<br><b>PF:</b> Poor OM, type B2.                                                                                                                                                                                                            |
| SH-22-130607-2 | 149 | P | Early Eocene (Ypresian)                             | TP13b      | Amiran | Inner - Middle Neritic                          | <b>P:</b> <i>Apectodinium paniculatum</i> , <i>A. quinquelatum</i> , <i>Adnatosphaeridium vittatum</i> .<br><b>PF:</b> Good recovery, type M2(3).                                                                                                                             |
| SH-19-130607-6 | 129 | P | Late Eocene (Priabonian) to Early Eocene (Ypresian) | TP 12 - 13 | Amiran | Indeterminate                                   | <b>P:</b> Based on stratigraphical position.<br><b>PF:</b> Good OM, type (M?)2                                                                                                                                                                                                |
| SH-17-130607-2 | 104 | P | Early Eocene (Ypresian)                             | TP13b      | Amiran | Inner - Middle Neritic                          | <b>P:</b> <i>Homotryblum tenuispinosum</i> , <i>Diphyes colligerum</i> , <i>Systematophora placacantha</i> , <i>Systematophora placacantha</i> , <i>Adnatosphaeridium vittatum</i> , stratigraphical position (early Ypresian above)<br><b>PF:</b> Good recovery; type M2(3). |

Total number of samples analysed: 29

Section: NE Rit

| Summarised stratigraphy (interpreted) |   |       |                                                     |
|---------------------------------------|---|-------|-----------------------------------------------------|
| SH-07                                 | - | SH-07 | No younger than Middle Eocene (Lutetian)            |
| SH-10                                 | - | SH-10 | Middle Eocene (Lutetian) to Early Eocene (Ypresian) |
| SH-15                                 | - | SH-18 | Early Eocene (Ypresian)                             |

| Sample         | Level in section (m) | Analysis | Age                                                 | Biozone            | Formation | Palaeoenvironment       | Biostratigraphy comments                                                                                                                                                                  |
|----------------|----------------------|----------|-----------------------------------------------------|--------------------|-----------|-------------------------|-------------------------------------------------------------------------------------------------------------------------------------------------------------------------------------------|
| SH-07-180607-1 | 1122                 | P        | No younger than Middle Eocene (Lutetian)            | TP 12b (or older?) | Kashkan   | Inner neritic           | <b>P:</b> <i>Areoligera senonensis</i> .<br><b>PF:</b> Poor to very poor OM, type M2s.                                                                                                    |
| SH-10-180607-1 | 841                  | P        | Middle (Lutetian) to Early Eocene (Ypresian)        | TP 12b - 13a       | Kashkan   | Inner neritic           | <b>P:</b> <i>Melitasphaeridium pseudorecurvatum</i> , <i>Apectodinium homomorphum</i> .<br><b>PF:</b> Very poor OM, type M2s.                                                             |
| SH-15-180607-2 | 578                  | P        | Early Eocene                                        | TP 13b-13a         | Amiran    | Middle neritic          | <i>Adnatosphaeridium vittatum</i> , <i>Systematophora placacantha</i> , <i>Homotryblum tenuispinosum</i> .<br><b>PF:</b> Good OM, type M3.                                                |
| SH-16-180607-2 | 531                  | P        | Early Eocene                                        | TP 13b-a           | Amiran    | Inner to middle neritic | <b>P:</b> <i>Glaphrocysta ordinata</i> , <i>Homotryblum tenuispinosum</i> , <i>Adnatosphaeridium vittatum</i> , <i>Perforicolpites digitatus</i> .<br><b>PF:</b> Moderate OM, type M3(2). |
| SH-17-180607-2 | 351                  | P        | Middle Eocene (Lutetian) to Early Eocene (Ypresian) | TP 12b-13a         | Amiran    | Inner neritic           | <b>P:</b> <i>Adnatosphaeridium vittatum</i> , <i>Melitasphaeridium pseudorecurvatum</i> .<br><b>PF:</b> Good OM, type M2.                                                                 |
| SH-18-180607-2 | 91                   | P        | Middle Eocene (Lutetian) to Early Eocene (Ypresian) | TP 12-13           | Amiran    | Inner to middle neritic | <b>P:</b> <i>Lentinia wetzeli</i> .<br><b>PF:</b> Good OM, type M3(2).                                                                                                                    |

Total number of samples analysed: 6

Section: SW Rit

| Summarised stratigraphy (interpreted) |   |      |                         |
|---------------------------------------|---|------|-------------------------|
| SH-9                                  | - | SH-3 | Early Eocene (Ypresian) |

| Sample | Level in | Analysis | Age | Biozone | Formation | Palaeoenvironment | Biostratigraphy comments |
|--------|----------|----------|-----|---------|-----------|-------------------|--------------------------|
|--------|----------|----------|-----|---------|-----------|-------------------|--------------------------|

|                |                    |   |                                                     |            |               |                            |                                                                                                                                                                                                                                                                   |
|----------------|--------------------|---|-----------------------------------------------------|------------|---------------|----------------------------|-------------------------------------------------------------------------------------------------------------------------------------------------------------------------------------------------------------------------------------------------------------------|
|                | <b>section (m)</b> |   |                                                     |            |               |                            |                                                                                                                                                                                                                                                                   |
| SH-9-220607-2  | 408                | P | Early Eocene (Ypresian)                             | TP 13b     | Amiran        | Middle neritic             | <b>P:</b> <i>Apectodinium paniculatum</i> , <i>A. parvum</i> , <i>A. homomorphum</i> , <i>Adnatosphaeridium vittatum</i> , <i>Homotryblium tenuispinosum</i><br><b>PF:</b> Good OM, type M3                                                                       |
| SH-8-220607-2  | 289                | P | Early Eocene, (Ypresian)                            | TP 13b     | Amiran        | Middle neritic             | <b>P:</b> <i>Apectodinium quinquelatum</i> , <i>Hystrichosphaeridium tubiferum</i> ,<br><i>Adnatosphaeridium vittatum</i> , <i>A. multispinosum</i> , <i>Homotryblium tenuispinosum</i> ,<br><i>Systematophora placacantha</i> .<br><b>PF:</b> Good OM, type M3   |
| SH-6-220607-2  | 216                | P | Early Eocene, (Ypresian)                            | TP 13b     | Amiran        | Inner to middle neritic    | <b>P:</b> <i>Apectodinium paniculatum</i> , <i>A. quinquelatum</i> ,<br><i>Adnatosphaeridium robustum</i> ,<br><i>Homotryblium tenuispinosum</i> , <i>Perforicolpites digitatus</i><br><b>PF:</b> Good OM, type M2(3)                                             |
| SH-4-220607-1  | 135                | P | Middle Eocene (Lutetian) to Early Eocene (Ypresian) | TP 12b-13b | Amiran        | Middle neritic             | <b>P:</b> <i>Adnatosphaeridium robustum</i> , <i>Homotryblium tenuispinosum</i><br><b>PF:</b> Good OM, type M3                                                                                                                                                    |
| SH-14-120607-3 | 130                | P | Indeterminate                                       | Indet      | Amiran        | Continental - Transitional | <b>P:</b> No age diagnostic forms<br><b>PF:</b> Good OM, type BT3                                                                                                                                                                                                 |
| SH-14-120607-2 | 129                | P | Middle Eocene (Lutetian) to Late Palaeocene         | TP 12c-14  | Amiran        | Inner - Middle Neritic     | <b>P:</b> <i>Apectodinium homomorphum</i> .<br><b>PF:</b> Good recovery; type M2(3)                                                                                                                                                                               |
| SH-3-220607-1  | 64                 | P | Early Eocene (Ypresian)                             | TP 13b     | Amiran        | Middle neritic             | <b>P:</b> <i>Retidiporites magdalensis</i> (sporomorph), <i>Homotryblium tenuispinosum</i> ,<br><i>Adnatosphaeridium vittatum</i> , <i>Apectodinium homomorphum</i> ,<br><i>Cerodinium wardense</i><br><b>PF:</b> Very good OM, type M3                           |
| SH-2-230607-2  | 15                 | P | Early Eocene (Ypresian)                             | TP 13      | Amiran        | Inner neritic              | <b>P:</b> <i>Adnatosphaeridium vittatum</i> , <i>Systematophora placacantha</i> ,<br>stratigraphic position<br><b>PF:</b> Good OM, type M2                                                                                                                        |
| SH-1-230607-2  | 5                  | P | Early Eocene, (Early Ypresian)                      | TP 13a     | Amiran        | Inner neritic              | <b>P:</b> <i>Apectodinium paniculatum</i> , <i>A. quinquelatum</i> ,<br><i>Hystrichosphaeridium tubiferum</i> ,<br><i>Adnatosphaeridium vittatum</i> , <i>Diphyes colligerum</i> .<br><b>PF:</b> Moderate OM, type M2                                             |
| SH-3-230607-2  | 2                  | P | Early Eocene (Ypresian)                             | TP 13      | Purple Shales | Inner to middle neritic    | <b>P:</b> <i>Hystrichosphaeridium tubiferum</i> , <i>Cerodinium speciosum</i> ,<br><i>Deflandrea denticulata</i> ,<br><i>Wetzeliella articulata</i> , <i>Hystrichokolpoma rigaudiae</i> ,<br><i>Adnatosphaeridium vittatum</i><br><b>PF:</b> Good OM, type M2(3)d |

**Total number of samples analysed:** 10

**Section:** NE Chenareh

| Summarised stratigraphy (interpreted) |   |       |                                                            |
|---------------------------------------|---|-------|------------------------------------------------------------|
| SH-12                                 | - | SH-3  | Indeterminate                                              |
| SH-2                                  | - | SH-2  | Middle Eocene (Lutetian ) to Early Eocene (Ypresian)       |
| SH-18                                 | - | SH-14 | Early Eocene (Ypresian)                                    |
| SH-4                                  | - | SH-4  | earliest Eocene (Ypresian) - latest Palaeocene (Thanetian) |

| Sample         | Level in section (m) | Analysis | Age                                                 | Biozone       | Formation            | Palaeoenvironment       | Biostratigraphy comments                                                                                                                                                                                                                                                          |
|----------------|----------------------|----------|-----------------------------------------------------|---------------|----------------------|-------------------------|-----------------------------------------------------------------------------------------------------------------------------------------------------------------------------------------------------------------------------------------------------------------------------------|
| SH-12-200607-2 | 581.5                | P        | Indeterminate                                       | Indeterminate | Taleh Zang - Kashkan | Indeterminate           | <b>P:</b> Barren<br><b>PF:</b> Good OM, Mostly P4, type 2                                                                                                                                                                                                                         |
| SH-3-200607-2  | 455                  | P        | Indeterminate                                       | Unassigned    | Amiran               | Inner to middle neritic | <b>P:</b> No age diagnostic forms<br><b>PF:</b> Moderate OM, type M2(3)                                                                                                                                                                                                           |
| SH-2-200607-4  | 311                  | P        | Middle Eocene (Lutetian) to Early Eocene (Ypreian)  | TP 12b - 13a  | Amiran               | Inner to middle neritic | <b>P:</b> <i>Homotryblium tenuispinosum</i> , <i>Adnatosphaeridium vittatum</i> ,<br><i>Phthanoperidinium amoenum</i> , <i>P. levimurum</i> , <i>Areoligera senonensis</i> ,<br><i>Glaphyrocysta ordinata</i><br><b>PF:</b> Poor to moderate OM, type M2(3)s                      |
| SH-18-190607-2 | 296                  | P        | Early Eocene (Early Ypresian)                       | TP 13a        | Amiran               | Middle neritic          | <b>P:</b> <i>Apectodinium quinquelatum</i> , <i>A. homomorphum</i> , <i>Thalassiphora patula</i> ,<br><i>T. pelagica</i> , <i>Homotryblium tenuispinosum</i> , <i>Adnatosphaeridium vittatum</i><br><b>PF:</b> Good OM, type M3                                                   |
| SH-17-190607-2 | 280                  | P        | Early Eocene (Early Ypresian)                       | TP 13a        | Amiran               | Inner to middle neritic | <b>P:</b> <i>Apectodinium hyperacanthum</i> , <i>A. quinquelatum</i> , <i>Thalassiphora pelagica</i> ,<br><i>Dracodinium simile</i> , <i>Homotryblium tenuispinosum</i> ,<br><i>Hystrichokolpoma cinctum</i> ,<br><i>Wetzeliella articulata</i><br><b>PF:</b> Good OM, type M3(2) |
| SH-14-190607-2 | 181                  | P        | Middle Eocene (Lutetian) to Early Eocene (Ypresian) | TP 12b-13b    | Amiran               | Inner neritic           | <b>P:</b> <i>Adnatosphaeridium vittatum</i><br><b>PF:</b> Poor OM, type M2                                                                                                                                                                                                        |
| SH-4-190607-2  | 20                   | P        | earliest Eocene to latest Palaeocene                | TP 13b -14    | Amiran               | Inner to middle neritic | <b>P:</b> <i>Apectodinium paniculatum</i> , <i>A. quinquelatum</i><br><b>PF:</b> Moderate OM, type M2(3)                                                                                                                                                                          |

Total number of samples analysed: 7
